# Supplementary material for: Prediction and variation of auroral oval boundary based on deep learning model and space physical parameters
Source: Copernicus journal article supplement (doi:10.5194/npg-2019-28), 2019-06-05
Supplement: Supplementary file [file npg-2019-28-AC4-supplement.zip]

# Prediction and variation of auroral oval boundary based on deep learning model and space physical parameters

Yiyuan Han<sup>1</sup>, Bing Han<sup>1</sup>, Zejun Hu<sup>2</sup>, Xinbo Gao<sup>1</sup>, Lixia Zhang<sup>1</sup>, Huigen Yang<sup>2</sup>, Bin Li<sup>2</sup>

<sup>1</sup>School of Electronic Engineering, Xidian University, Xi'an 710071, China

5 <sup>2</sup>SOA Key Laboratory for Polar Science, Polar Research Institute of China, Shanghai 200136, China

*Correspondence to:* Bing Han (bhan@xidian.edu.cn)

**Abstract.** The auroral oval boundary represents important physical process with implications for the ionosphere and magnetosphere. An automatic auroral oval boundary prediction method based on deep learning in this paper is applied to study the variation of auroral oval boundary, associated with different space physical parameters. We construct an auroral oval boundary dataset to train our proposed model, which consists of 184416 auroral oval boundary points extracted from 3842 Ultraviolet Imager (UVI) image captured by Ultraviolet Imager of the Polar satellite and its corresponding 18 space physical parameters selected from OMNI dataset during December 1996 to March 1997. Furthermore, several statistical experiments and correlation analysis experiment are performed based on our dataset to explore the relationship between space physical parameters and the location of auroral oval boundary. The experiment results show that the prediction model based on deep learning method can estimate auroral oval boundary efficiently, and different space physical parameters have different effects on auroral oval boundary, especially interplanetary magnetic field (IMF), geomagnetic indexes and solar wind parameters.

## 1 Introduction

Auroral oval is a circular belt of auroral emission around magnetic poles (Loomis, 1890; Akasofu, 1964). The auroral oval poleward and equatorward boundaries are related to geophysical parameters, which can implicit for the coupling process among the solar wind, ionosphere and magnetosphere. For example, the polar cap ionosphere, which is considered as an area of opening magnetic field inside auroral oval poleward boundary. This area is closed related with energetic particle entrance from heliosphere to earth's atmosphere. So, the segmentation and prediction for auroral oval boundary are very significant for studying on certain physical events.

In the past few decades, scholars have constructed extensive researches on the relationship between location of auroral oval boundary and space physical parameters (Niu et al., 2015). In early research, Feldstein proposed that the position of auroral oval boundary is correlated with the Q-index of magnetic activity on the nightside of earth (Feldstein and Starkov, 1967). Starkov and Holzworth expressed that inner and outer boundaries of auroral oval can change with geomagnetic indexes and IMF (Holzworth and Meng, 1975; Holzworth and Meng, 1984; Starkov, 1994(a)). The conclusions in this paper are based on mathematical statistics. Therefore, Starkov designed some simple formulas to describe the relationships between the

specific physical parameter and different type of aurora. Variations of the size of polar cap, auroral oval and diffuse aurora were regarded as three independent function variables of AL index (Starkov, 1994(b)). Since then, many scholars had been explored the connections between different physical parameters and auroral oval boundary or other auroral events. Carbary constructed a-Kp-related model of auroral oval boundary by binning UVI images from different months (Carbary, 2005). For describing the particle precipitation characteristics, Zhang proposed a-Kp-dependent model of the mean energy and energy flux precipitating electrons in auroral oval (Zhang and Paxton, 2008). Sigernes used a Kp-based function to calculate the size and position of auroral oval, and compared the Kp-dependent model with methods which proposed by Zhang and Starkov to explain the superiority of his proposed model (Sigernes et al., 2011). Milan proposed a model based on average proton and electron of auroral images from three years observed by the IMAGE spacecraft. The experiment demonstrated that Kp, solar wind parameters including solar wind velocity, density, and pressure, interplanetary magnetic field (IMF) magnitude and orientation have effect on the intensity and shape of auroral oval (Milan, 2010). After 2010, there are more and more new methods to construct connection between the position of auroral oval boundary and auroral oval boundary with the development of machine learning. Hu and Yang used the segmentation results of auroral oval obtained from UVI on Polar satellite to build connection between the position of auroral oval boundary and AE index, IMF and solar wind parameters by using multiple regression method (Hu et al., 2017; Yang et al., 2016). Ding presented a C-means clustering algorithm based on fuzzy local information to extract auroral oval poleward and equatorward boundaries from merged images with filled gaps captured from both GUVI and SSUSI (Ding et al., 2017). However, the position of auroral oval boundary is not determined by one space physical parameter, those methods mentioned above just only used one or several space physical parameters to explore the relationship between space physical parameters and auroral oval boundary. We can't determine whether other space physical parameters can influence the location or size of auroral oval. And we also don't know whether the mapping relationship between space physical parameters and auroral oval boundary is linear or nonlinear.

As we know, machine learning has been applied to many fields, including medical, traffic, space physics and other interdisciplinary fields. Recently, deep learning models have led to a series of breakthroughs on image classification, object detection, image recognition and other fields. Conventional machine learning methods have some limitations for processing complex data, especially in space physics field. There are no suitable internal features, such as shape, colour and so on. Therefore, many effective machine learning methods can't obtain satisfied performance on processing space physics data. While, deep learning methods are representation-learning methods with multiple levels of representation. It has turned out to be very good at discovering intricate structures in high dimensional data and multimodal data (LeCun et al., 2015).

In this paper, a new automatic auroral oval boundary prediction model is proposed based on deep learning method. The experiment results show that the model proposed in this paper can predict aurora oval boundary accurately by using space physical parameters and the location of auroral oval boundary at the previous moment. In addition, we explore the effect of every space physical parameter on auroral oval boundary. The rest of this paper is organized as follows. Sect. 2 describes our proposed algorithm in detail. The experiment analysis and discussion are given in Sect. 3, including dataset construction,

subjective and objective evaluation, the selection of model parameters and the discussion about influence of every space physical parameter on auroral oval boundary. Finally, we draw several conclusions in Sect. 4.

## 2 Prediction of auroral oval boundary based on deep learning method

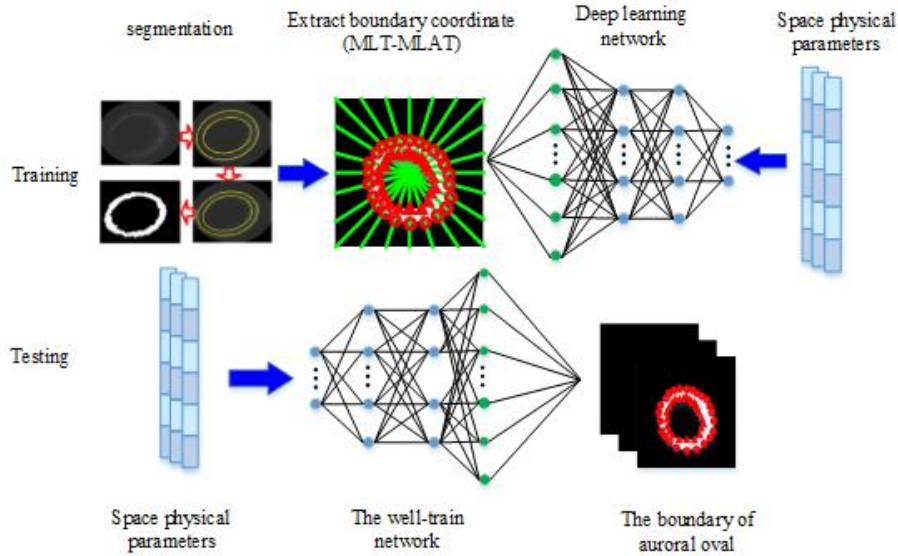

**Figure 1: The flowchart of auroral oval boundary prediction model based on deep learning.**

The flowchart of auroral oval boundary prediction model is shown in Fig. 1. There are two major steps in our proposed model, pre-training on our dataset and online prediction. In the training phase, auroral oval images are usually affected by heavy noise and other **interferences**. So, the auroral oval boundary is blurred and it is difficult to find from background. Compared with other image segmentation methods, **Maximal Similarity Based Region Merging (MRSM)** (Liu et al., 2013) can eliminate the cumbersome process of adjusting parameters and has better segmentation accuracy. We use MRSM firstly to extract positions of auroral oval boundary. The center of auroral oval spatial distribution in magnetic local time-magnetic latitude coordinate (**MLT-MLAT**) is located in the geomagnetic pole. The magnetic latitude of auroral oval usually ranged from 57.5 degree to 73.5 degree according to the statistic studies on previous work (King and Papitashvili, 2014). In order to unify the distribution of aurora oval boundary, the coordinates of those extracted boundary points are transformed into MLT-MLAT coordinate secondly. Finally, these transformed boundary points and its corresponding space physical parameters were input into deep learning network to train our prediction model. In the testing phase, we can obtain the corresponding boundary points of auroral oval by sending those space physical parameters and the position of auroral oval boundary points at the previous moment to our well-trained network.

The deep learning network is constructed by a two-layer Restrict Boltzmann Machine (RBM) network (Hinton et al., 2006; Yu and Deng, 2011) and a Radial Basis Function (RBF) network (Łukaszzyk, 2004). The computational processing of

RBM and RBF are illustrated by Eq. (1)-(4). In the training phase, the input of RBM network are 18 space physical parameters from OMNI dataset and coordinate values of auroral oval poleward and equatorward boundaries extracted from segmented UVI images with MRSIM. It can be represented as  $X = [x_1, x_2, \dots, x_m]^T$ , where  $m$  is the number of network nodes. The first layer of RBM network is denoted as  $\theta_1 = \{w_{i_1 j_1}, a_{i_1}, b_{j_1}\}$ , where  $w_{i_1 j_1}$  is the weight between the visible unit  $i_1$  and the hidden unit  $j_1$ ,  $a_{i_1}$  is the bias of visible unit  $i_1$ ,  $b_{j_1}$  is the bias of hidden unit  $j_1$ . The hidden layer of the first layer in RBM network is the visible layer of the second layer in RBM network, which is denoted as  $\theta_2 = \{w_{j_1 j_2}, a_{j_1}, b_{j_2}\}$ , where  $w_{j_1 j_2}$  is weight between the visible unit  $j_1$  and the hidden unit  $j_2$ ,  $a_{j_1}$  is the bias of visible unit  $j_1$ ,  $b_{j_2}$  is the bias of hidden unit  $j_2$ . The output of the first layer of RBM network is denoted as  $Y_1 = [y_{11}, y_{12}, \dots, y_{1n}]^T$ , where  $n$  denotes the nodes number of the first layer in RBM network.

$$y_{1j_1} = \sum_{i=1}^m x_{i_1} w_{i_1 j_1} + b_{j_1} \quad j_1 = 1, 2, \dots, n \quad (1)$$

The output of the second layer of RBM network is denoted as  $Y_2 = [y_{21}, y_{22}, \dots, y_{2c}]^T$ , where  $c$  denotes the nodes number of the second layer in RBM network.

$$y_{2j_2} = \sum_{j=1}^n x_{j_1} w_{j_1 j_2} + b_{j_2} \quad j_2 = 1, 2, \dots, c \quad (2)$$

Finally, since Contrastive Divergence (CD) (Hinton, 2002) is an approximation of the log-likelihood gradient what has been found to be a successful update rule for training RBM, we can obtain a well-trained RBM network by CD.

The function of RBF network can make the output of RBM network infinitely approximate to the coordinate values of auroral oval boundary by a radial basis function. The input of RBF network is the output of second layer in RBM network. The output of RBF network is represented as  $Y = [y_1, y_2, \dots, y_d]^T$ , where  $d$  denotes the number of the output layer nodes.  $w_{j_3 o}$  is weight between hidden unit  $j_3$  and the output node  $o$ .  $l$  is the number of radial basis function.  $\varphi_{j_3}$  is the  $j_{th}$  radius basis function and  $c_{j_3}$  is the center of  $j_{th}$  radial basis function.  $\sigma_{j_3}$  is the center width of radial basis function.

$$y_o = \sum_{j_3=1}^l w_{j_3 o} \varphi_{j_3}(\|Y_2 - c_{j_3}\|) \quad o = 1, 2, \dots, d \quad (3)$$

$$\varphi_{j_3}(\|Y_2 - c_{j_3}\|) = \exp\left(-\frac{\|Y_2 - c_{j_3}\|^2}{\sigma_{j_3}^2}\right) \quad j_3 = 1, 2, \dots, l \quad (4)$$

### 3 Experiments and results analysis

#### 3.1 Dataset construction and evaluation criterion

The auroral oval images used in this paper are captured by Ultraviolet Imager (UVI) which is a 2-D snapshot type camera on Polar satellite. The UVI on Polar satellite has acquired more than several millions of images during its entire mission. In April 2008, it no longer works. There was no effective observation after 2000, because Polar satellite changed its view after 2000. In order to balance the relationship between spatial resolution and global coverage, the spatial resolution of UVI is 30KM at apogee, the CCD array on board has 224\*220 pixels and the single pixel spatial resolution is 0.0036 degree and 0.04 degree in two directions respectively. The unilluminated edges of CCD are discarded, which results in the frame size of an auroral

oval image is 200 by 228 pixels, and the frame rate is 37s. There are 4 band sensors aboard satellite usually, UVI images in our dataset are derived from Lyman-Brige-Hopfield long band (160-180nm). In our experiments, each auroral oval image is divided into 24 magnetic regions centered on geomagnetic pole according to magnetic local time (MLT). As shown in Fig. 2, the intersection points between auroral oval boundary and division line are extracted. 48 boundary points are gathered from one auroral oval image. The poleward and equatorward boundary points are marked as red triangle and red circle respectively.

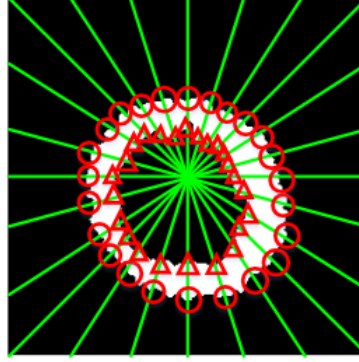

**Figure 2: The schematic of extracting auroral boundary points.**

**Table 1: Space physical parameters selected from OMNI dataset.**

| Parameter name             | Units              |
|----------------------------|--------------------|
| Bx                         | nT                 |
| By                         | nT                 |
| Bz                         | nT                 |
| Flow Speed (Vp)            | Km s <sup>-1</sup> |
| Proton density (Np)        | n cc <sup>-1</sup> |
| Temperature                | K                  |
| Flow pressure (pdyn)       | nPa                |
| Electric Field             | Mv m <sup>-1</sup> |
| Plasma beta                | -                  |
| Alfven mach number         | -                  |
| AE-1-min AE-index          | -                  |
| AL-1-min AL-index          | -                  |
| AU-1-min AU-index          | -                  |
| SYM/D-1-minute SYM/D index | -                  |
| SYM/H-1-minute SYM/H index | -                  |
| ASY/D-1-minute ASY/D index | -                  |
| ASY/H-1-minute ASY/H index | -                  |

The space physical parameters downloaded from NASA OMNI dataset with different time resolution. It is common knowledge that IMF, solar wind parameters, geomagnetic Indexes have a time resolution of 1 min, the other space physical parameters maybe have a higher time resolution. **According to the effect derived from other circumstance factors**, such as, the time to traverse magnetosphere and Alfven wave, not all the response time of auroral events are equal to its propagation time. We align the time of all space physical parameters with the time of UVI images in our dataset to avoid the problem of different time resolution between space physical parameters and auroral oval images. In OMNI dataset, we selected 18 space physical parameters including the common parameters which has been verified to be related to the position of auroral oval boundary (Holzworth and Meng, 1975; Starkov, 1994(a); Starkov, 1994(b); Milan et al., 2010; Hu et al., 2017) and some unfamiliar parameters which are never discussed in previous works. Therefore, our dataset includes 184416 auroral oval boundary points extracted from 3842 UVI images and its corresponding values of 18 space physical parameters. Table 1 shows 18 space physical parameters **which** we used in this paper.

In order to evaluate the precision of predicted auroral oval boundary points by our model, we use the common metric MAE (Mean Absolute Error) to assess the error between predicted auroral oval boundary points and real auroral oval boundary points. The MAE (Mean Absolute Error) can be defined as Eq. (5).

$$MAE = \frac{1}{24} \sum_{i=1}^{24} \left( \frac{1}{k} \sum_{j=1}^k |F_{MLAT}^{ij} - S_{MLAT}^{ij}| \right) \quad (5)$$

$S_{MLAT}^{ij}$  represents MLAT of the  $j_{th}$  test sample at  $j_{th}$  MLT region obtained from the segmented image, and  $F_{MLAT}^{ij}$  indicates MLAT of the  $j_{th}$  test sample at  $i_{th}$  MLT region acquired by our prediction model.  $k$  is the total number of test samples.

### 3.2 Parameters setup of deep learning network

Since the effectiveness of prediction model is influenced by the number of hidden layer nodes in RBM network (Hinton, 2012) and the training error of RBF network, we build two experiments to find the most suitable parameters for our network. For both experiments, space physical parameters and position of poleward and equatorward boundary points in 24 MLT regions of 3000 UVI images are selected as training samples, the remaining are regarded as test samples. In experiment 1, the training error of RBF network is set to 4 magnetic latitude and the number of hidden layer nodes in RBM network are 32, 64, 96 and 128 respectively. We use the average MAE with 100 experiments to verify the stability of our model, because training samples and test samples were divided by random number. The corresponding MAE is shown in Fig. 3(a). From the Fig. 3(a), MAE reaches the smallest value when the number of hidden layer nodes are set to 32. In experiment 2, the number of hidden layer nodes are set to 32 according to the results in experiment 1. There often has overfitting problem when we train a neural network (Krizhevsky et al., 2012). Overfitting can be interpreted as a phenome-non, which is the model performs well on training set and unsatisfactorily on test set. We set different training error to avoid overfitting problem. So, the training error of RBF network is set to 2, 4, 6 and 8 magnetic latitudes empirically. The corresponding MAE is shown in Fig. 3(b), and MAE reaches the minimum when the training error of RBF network is 4 magnetic latitudes. From the two experiment results above, we set

the number of hidden layer nodes in RBM network and the training error of RBF network to 32 and 4 respectively as the optimal parameters of deep learning network in the following experiments.

To demonstrate the availability of our proposed model, we compared the proposed model with Back Propagation (BP) network (Rumelhart, 1986) and Yang’s model (Yang et al., 2016). The subjective prediction results obtained by the three method are shown in Fig. 4, circles and squares stand for poleward boundary points and equatorward boundary points which are obtained from the segmented image, ‘+’ and ‘×’ marks represent poleward boundary points and equatorward boundary points respectively which are obtained from our prediction model. Although these three methods have similar prediction results in most areas on auroral oval boundary, it is obviously that our method can obtain more accurate boundaries than the other two compared methods, where marked by blue rectangle and red rectangle in Figure 4. In more detail, the results of BP model and our model are shown in Fig. 4(a) and Fig. 4(b) respectively, we can clearly see that the distances between auroral oval boundary points predicted by our method and real auroral oval boundary points are smaller than the distances between BP model’s results and real auroral oval boundary points in red rectangle areas. From Fig. 4(a) and Fig. 4(c), our prediction points are closer to real auroral oval boundary points compared with Yang’s prediction points in blue rectangle area. Meanwhile, the MAE of different methods are shown in Table 2. From this table, our method has the smallest MAE not only in poleward boundary but also in equatorward boundary, because our model can extract more useful information and feature from auroral oval images than the other two models. As a consequence, we can draw the conclusion that the proposed model in this paper is more suitable for predicting auroral oval boundary.

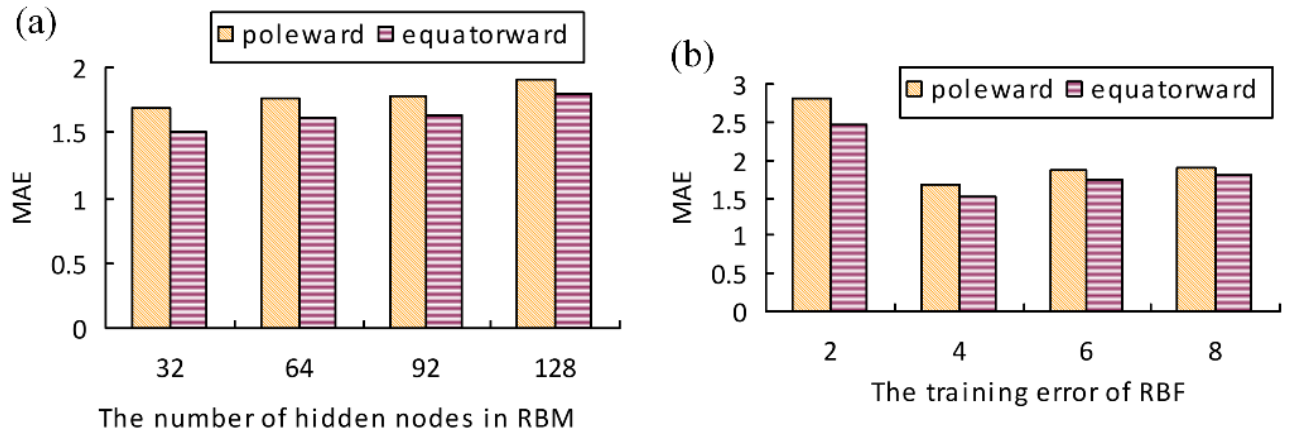

**Figure 3: (a)The MAE value of different hidden layer node, (b) The MAE value of different training error.**

**Table 2: The MAE value of different methods.**

| methods              | BP   | Yang’s | ours |
|----------------------|------|--------|------|
| Poleward boundary    | 2.20 | 2.01   | 1.69 |
| Equatorward boundary | 2.19 | 1.91   | 1.51 |



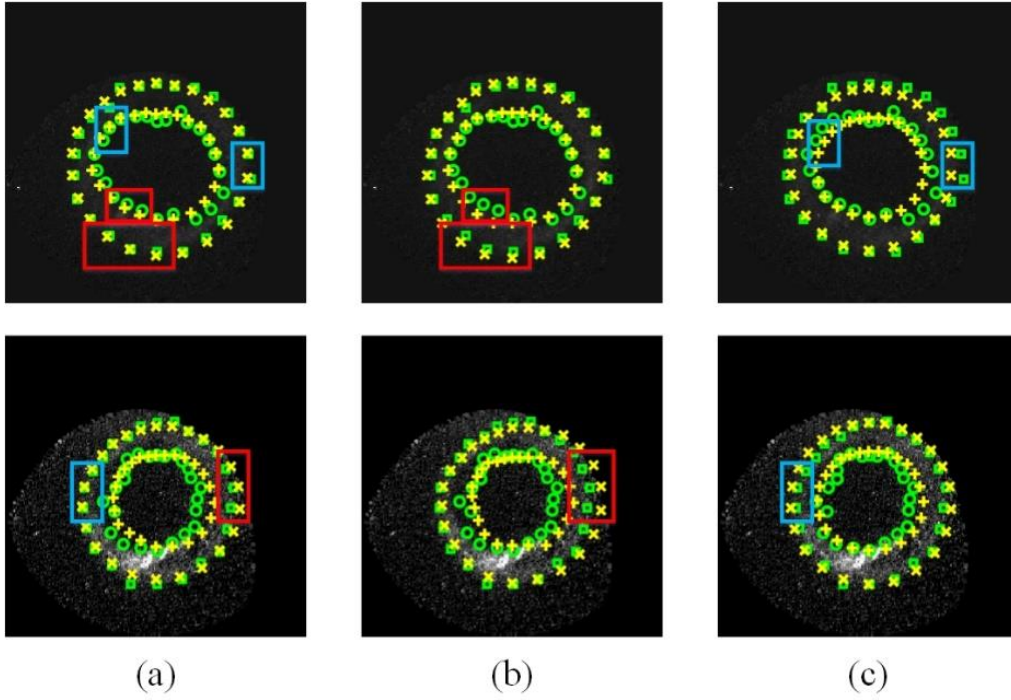

**Figure 4: The different subjective results based on different methods. (a) The subjective results predicted by our method (b) The subjective results predicted by BP network (c) The subjective results predicted by Yang's method**

### 5 3.3 The influence of space physical parameters on auroral oval boundary

As we known, the location of auroral oval boundary is affected by a variety of space physical parameters. Variation of auroral oval boundary in different MLT sectors are related to different space physical parameters. For sake of exploring the influence of space physical parameters on poleward and equatorward boundaries specifically, the boundary points are further processed as follows (Hu et al., 2017). Firstly, all poleward and equatorward boundary points are divided into 24 subsets of poleward and equatorward boundary points according to 24 MLT sectors. Secondly, in every MLT subset, we sort boundary data with respect to the value of all space physical parameters, and divide boundary data into 10 groups evenly. In order to observe the variation tendency of each parameter in different MLT sectors clearly, in every MLT sectors, the relationship between each space physical parameter and the location of auroral oval boundary was represented as a Quadratic Equation based on the principles of the least square conic fitting (Fitzgibbon et al., 1999). Then, we calculate the location of poleward and equatorward boundary points for each space physical parameter using this function. Finally, we use the boundary data which calculated by Quadratic Equation to discuss the influence of space physical parameters on auroral oval boundary. In this section, we build 3 statistical experiments to discuss how IMF, solar wind parameters and geomagnetic indexes influence on auroral oval boundary. An auroral oval boundary prediction experiment by inputting every single space physical parameter to explore



the relationship between auroral oval boundary and 18 space physical parameters. And a correlation analysis experiment is constructed to study the connection between combination of different space physical parameters and auroral oval boundary.

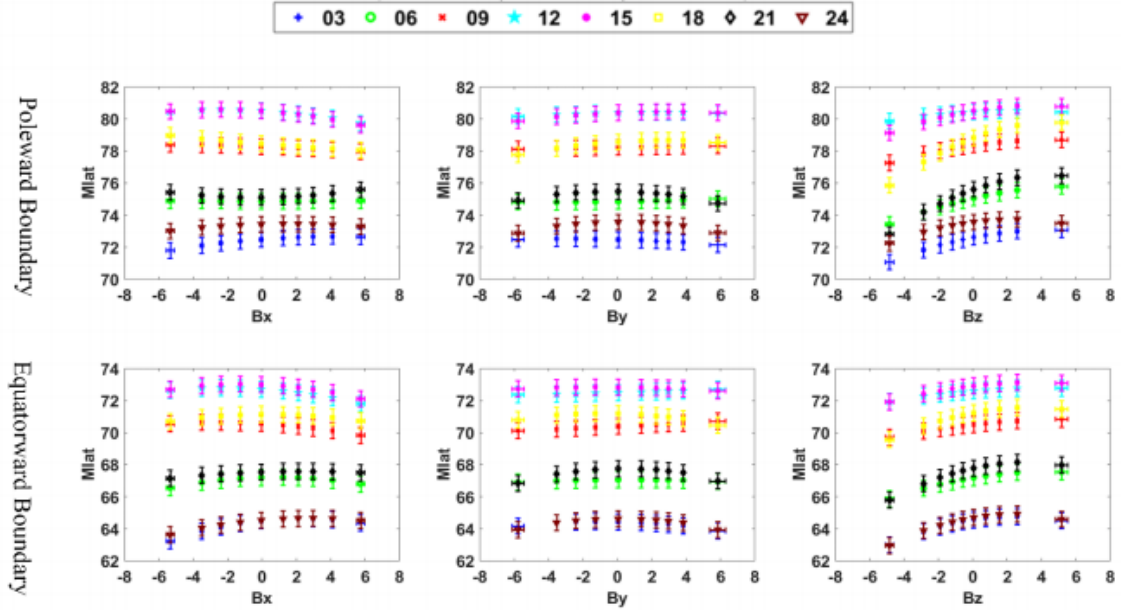

**Figure 5: Response of magnetic latitude of poleward (top row) and equatorward (bottom row) boundaries to Bx, By and Bz respectively at 0030,0060,0090,1200,1500,1800,2100 and 2400 MLT.**

### 3.3.1 Experiment 1: Influence of different IMF components on Aurora oval boundary

The IMF can affect auroral oval boundary through different space processes. In this experiment, response of different IMF components to auroral oval boundary are shown in Fig. 5. The different colour and shape markers represent different MLT sector. The vertical error bars represent one eighth of standard deviation from mean value of auroral oval boundary position, and the horizontal error bars represent standard deviation from mean value of different IMF components in each binned data. Therefore, the length of vertical error bar is fixed, the length of the horizontal error bars is changeable because of different standard deviation in each binned data.

From Fig.5, we can see that the poleward and equatorward boundaries in each MLT sector show a step-by-step poleward displacement with the increase of IMF Bz component. It has been widely accepted that IMF Bz controls the energy coupling between the solar wind and the magnetosphere (Cho et al., 2010; Makita et al., 1983). During a period of southward IMF ( $B_z < 0$ ), poleward motion of auroral oval boundary is due to a higher reconnection rate in the process of dayside reconnection. However, most poleward motion of auroral oval boundary occurred during northward IMF ( $B_z > 0$ ). Under northward IMF ( $B_z > 0$ ) condition, poleward activity of auroral oval boundary often related to IMF By component (Xing et al., 2013). The poleward and equatorward boundaries in 09:00-15:00 MLT show a gradually poleward displacement with the rise of IMF By component, and the poleward and equatorward boundaries in 18:00-06:00 MLT gradually approaches to pole with the decrease

of absolute of IMF By component from Fig.5. This statistical discovery proves previous studies on IMF By component. Such as, Karlson's observations **suggested** that IMF By component is related to prenoon-postnoon asymmetry of poleward activity (Karlson et al., 1996). And it is well known that ionospheric convection is mainly controlled by IMF Bz and By components (Cowley and Lockwood, 1992; Huang et al., 2000), which implies the prenoon-postnoon asymmetry of pole-ward activity is similar to the procedure of ionospheric plasma convection. Both two space activities mentioned above are affected by the variety of IMF By component (Provan et al., 1999). The poleward and equatorward boundaries in 21:00-06:00 MLT show a gradually poleward motion with the ascent of IMF Bx component observed from Fig.5, which is consistent with IMF By and Bz.

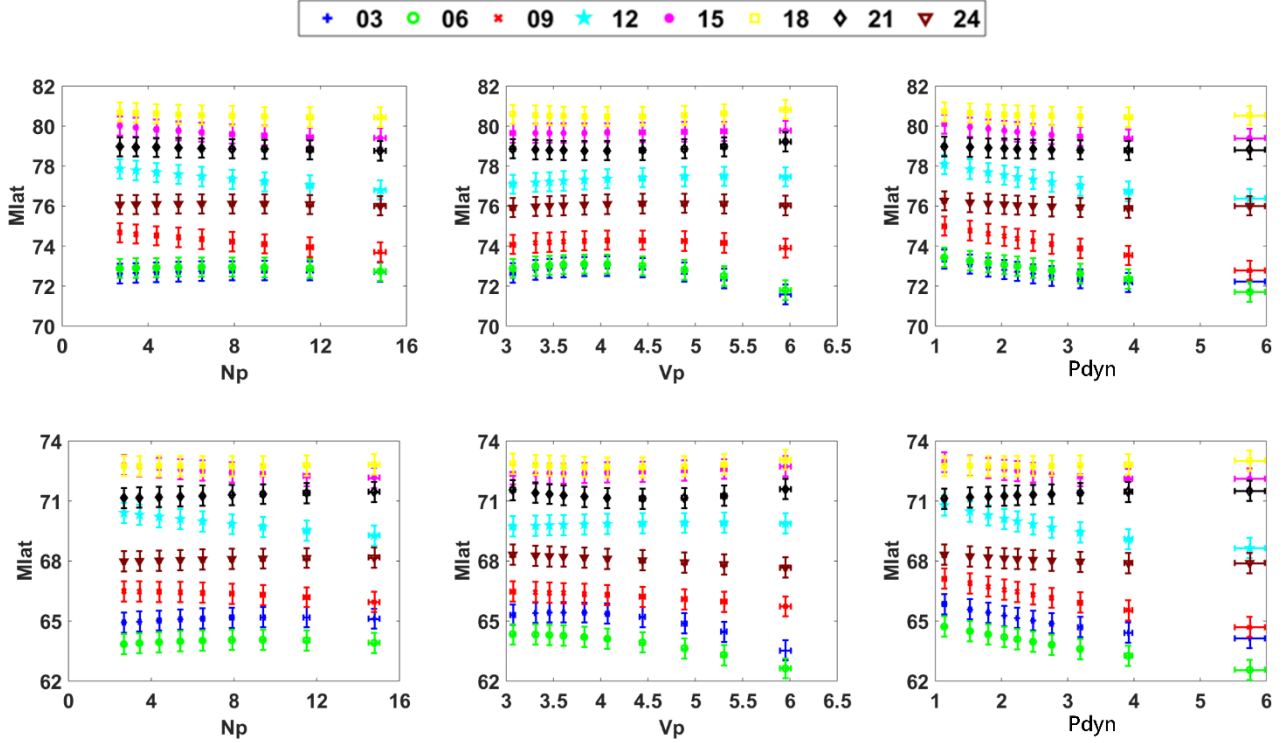

Figure 6: Response of magnetic latitude of poleward (top row) and equatorward (bottom row) boundaries to Np, Pdyn and Vp respectively at 0030,0060,0090,1200,1500,1800,2100 and 2400 MLT.

### 3.3.2 Experiment 2: Influence of different solar wind parameters on Aurora oval boundary

For sake of finding the variation trend of auroral oval boundary with the change of solar wind parameters, including solar wind density (Np), solar wind speed (Vp) and solar wind dynamic pressure (Pdyn) respectively, experiment 2 is performed. Fig.6 shows the response of different solar wind parameters on auroral oval boundary.

From Fig.6, both poleward boundary and equatorward boundaries shrink in 21:00-06:00 MLT when the value of Np rises. Meanwhile, poleward and equatorward boundaries in 09:00-18:00 MLT gradually approaches equator when the value of Np

risers. Besides, we can obtain the following conclusions: The poleward and equatorward boundaries in 03:00-18:00 MLT expand to equator clearly with the increase of  $P_{dyn}$ . And equatorward boundary in 21:00-24:00 MLT has a poleward motion with the increase of  $P_{dyn}$ . There has an obvious poleward motion in nightside sector impacted by the increscent  $P_{dyn}$  and  $N_p$  according the conclusions above. We can draw a coincident inference with previous studies. For examples, poleward displacement of auroral oval boundary along with the increscent  $P_{dyn}$ , which results from the shrunken polar cap (Cho et al., 2010). By extension, there must have some dependencies between the varying size of polar cap and nightside reconnection (Boudouridis et al., 2003). Compared with the change of auroral oval boundary in nightside sector, both poleward and equatorward boundaries are enlarged when the value of  $P_{dyn}$  and  $N_p$  rise, which observed from Fig.6. Previous explorations and simulations shown that enlarged  $P_{dyn}$  can enhance ionospheric potential and the corresponding field-direction current intensity, which can lead to increasement of global auroral activity intensity. Meanwhile, the position of auroral oval boundary will ex-tend to low latitudes (Peng et al., 2011). From Fig.6, it appears a distinct equatorward movement with increase of  $V_p$  in 24:00-06:00 MLT for both poleward boundary and equatorward boundary. This changing pattern of  $V_p$  and auroral oval boundary which we illustrate above is consistent with Hu's study in 2017 (Hu et al., 2017).

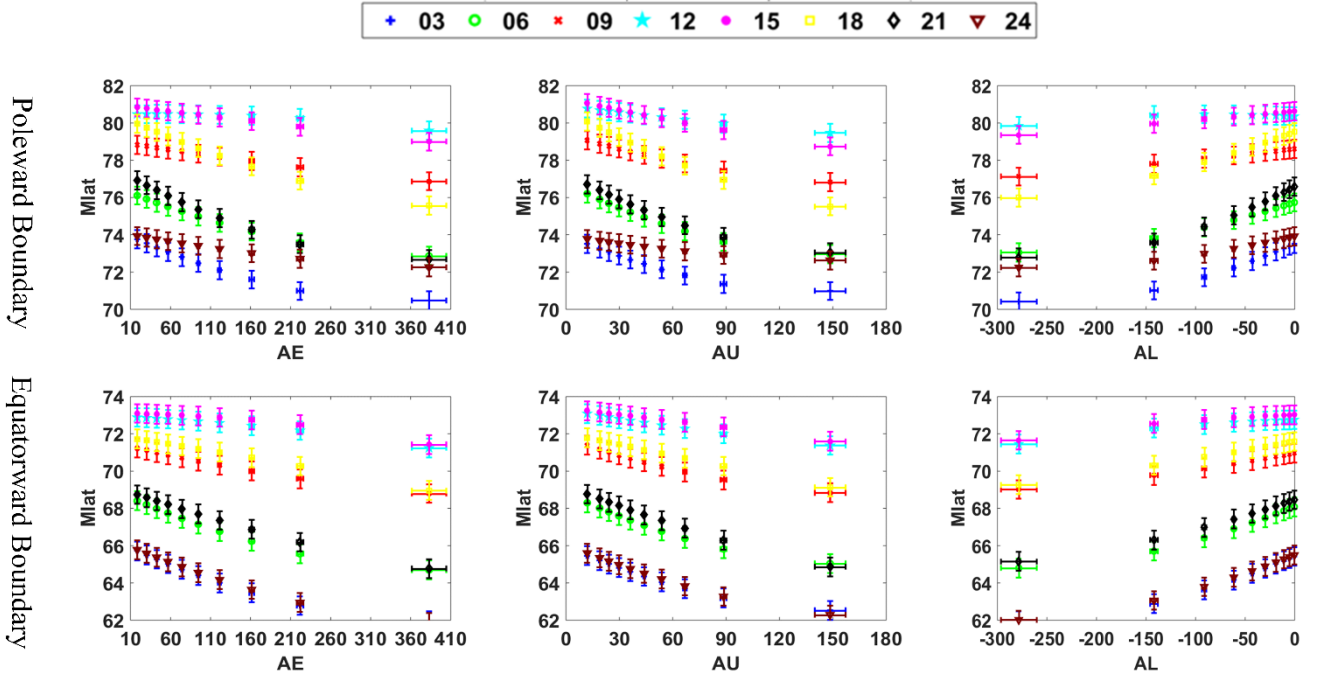

Figure 7: Response of magnetic latitude of poleward (top row) and equatorward (bottom row) boundaries to AE, AU and AL respectively at 0030,0060,0090,1200,1500,1800,2100 and 2400 MLT.

### 3.3.3 Experiment 3: Influence of geomagnetic indexes on Aurora oval boundary

In this experiment, the average tendency of poleward and equatorward boundaries influenced by geomagnetic indexes (AE, AL, AU) shows in Fig.7.

As we can see from Fig.7, in every MLT sector, pole-ward and equatorward boundary move to low magnetic latitude with the ascending AE and AU index. While, poleward and equatorward expand to high magnetic latitude with the ascending of AL index. AE index is often used to characterize the strength of substorm activity in magneto-sphere. Therefore, it can be considered that auroral oval expands to equator due to the enhance substorm activity. Furthermore, the amount of energy enters magnetotail along with the strengthening of substorm activity. It means that AE index will increase when energy in magnetotail re-released through substorm, which is coincident with our found about AE from Fig.7.

**Table 3: The MAE influenced by different space physical parameters.**

| Parameter name              | MAE(poleward/equatorward) |
|-----------------------------|---------------------------|
| Bx                          | <b>1.6222/1.4448</b>      |
| By                          | 1.6134/1.4462             |
| Bz                          | 1.6139/1.4476             |
| Flow Speed (Vp)             | 1.6117/1.4485             |
| Proton density (Np)         | <b>1.6285/1.4451</b>      |
| Temperature                 | 1.6129/1.4458             |
| Flow pressure (pdyn)        | <b>1.6242/1.4463</b>      |
| Electric Field              | 1.6113/1.4430             |
| Plasma beta                 | 1.6118/1.4435             |
| Alfven mach number          | 1.6193/1.4473             |
| AE-1-min AE-index           | 1.6183/1.4562             |
| AL-1-min AL-index           | <b>1.6325/1.4668</b>      |
| AU-1-min AU-index           | 1.6117/1.4517             |
| SYM/D-1-minute SYM/D index  | 1.6187/1.4500             |
| SYM/H-1-minute SYM/H index  | 1.6197/1.4581             |
| ASY/D-1-minute ASY/D index  | 1.6137/1.4550             |
| ASY/H-1-minute ASY/H index  | 1.6079/1.4500             |
| PC-1-minute Polar Cap index | 1.6120/1.4512             |

### 3.3.4 Experiment 4: Influence of all 18 space physical parameters on Aurora oval boundary

As we know, most of studies on how the space physical parameters affect auroral oval boundary are focus on solar wind parameters, geomagnetic indexes and IMF components. There are lots of corresponding conclusions about the influence of those space physical parameters on auroral oval boundary up to now. Nonetheless, how the other space physical parameters not mentioned above affect the auroral oval location has not been addressed. In order to further explore the variation of auroral oval boundary influenced by different space physical parameters, the experiment 4 is performed. In experiment 4, we send one

physical parameter selected from Table 1 at the present moment and the coordinates of auroral oval boundary points at the previous moment to our prediction model. And the output of our model are 48 coordinates values of auroral oval boundary points and the MAE between real boundaries and predicted boundaries. The MAE of poleward and equatorward boundaries influenced by different space physical parameters are given in Table 3. We can infer the response of auroral oval boundary to 18 space physical parameters through the different MAE of these space physical parameters.

The MAE of boundary position are 1.6076 and 1.4545 respectively when we only use boundary positions at the previous moment to predict poleward and equatorward boundaries. We take this MAE as standard, called S-MAE. Compared with the S-MAE, we can see that the MAE increase about 1.9% for poleward boundary by adding anyone space physical parameters into input of our model from Table 3. Meanwhile, the variety of MAE for equatorward boundary is between -0.7% and 0.7%. Although different space physical parameters have different influences on auroral oval boundary, compared to other space physical parameters in Table 3, the MAE of auroral oval boundary can display the greatest impact when AL, Bx, Np, Pdyn are used as the input of our model respectively, which suggests that these 4 space physical parameters mentioned above have a great influence on the position of auroral oval boundary.

**Table 4: The Pearson correlation coefficient of all 18 space physical parameters from Dec. 1996 to Mar. 1997.**

| Parameter name | Correlation coefficient |
|----------------|-------------------------|
| Vp-Np          | -0.5970                 |
| Vp-SYM/H       | -0.5120                 |
| Np-Pdyn        | 0.7662                  |
| Np-SYM/H       | 0.5584                  |
| AE-AL          | -0.9437                 |
| AE-AU          | 0.7139                  |
| AE-PC          | 0.8067                  |
| AL-PC          | -0.7079                 |
| AU-PC          | 0.6924                  |

### 3.3.5 Experiment 5: Correlation analysis of all 18 space physical parameters

In order to analyse the influence of space physical parameters on auroral oval efficiently, we not only consider the effect of each space physical parameter on auroral oval boundary, but also take the effect on auroral oval boundary with different combinations of space physical parameters into account in experiment 5. As a result, we first calculate the correlation of all 18 space physical parameters using Pearson correlation coefficient, which is a statistic value that reflects the degree of linear correlation between two variables. The Pearson correlation coefficient of two variables ( $X, Y$ ) equals the covariance of the two variables ( $X, Y$ ) divided by the product of their standard deviations ( $\sigma_X \sigma_Y$ ). The formula of Pearson correlation coefficient can be represented as Eq. (6), and the Pearson correlation coefficient of all 18 space physical parameters are given in Table 4. The

process of experiment 5 is similar to experiment 4 and the MAE of different space physical parameter combinations are given in Table 5.

$$\rho_{X,Y} = \frac{cov(X,Y)}{\sigma_X \sigma_Y} = \frac{E[(X-\mu_X)(Y-\mu_Y)]}{\sigma_X \sigma_Y} \quad (5)$$

The MAE of poleward and equatorward boundaries by using three components of IMF and auroral oval boundary positions at the pervious moment as the input of proposed model are 1.6313 and 1.4759 severally in Table 5. The MAE of three components of IMF combination is bigger than S-MAE. When the input of our model includes Bx, By and Bz, it is obviously that the MAE of poleward and equatorward boundaries both have significant increasement compared with the MAE of poleward and equatorward boundaries by inputting anyone IMF components to our model, which suggests that the three components of IMF have similar influence on auroral oval boundary. Previous investigations illustrated that auroral oval boundary is connected with the variation of IMF Bx, By, Bz (Huang et al., 2000; Provan et al., 1999). Our experiment results also demonstrate that the auroral oval boundary should be related with the three components of IMF. **Whether the northward or southward IMF direction are input to the proposed model, the MAE have marked change in both poleward and equatorward boundaries. Nevertheless, we can observe the more evident increasement of MAE in equatorward boundaries compared with the MAE of poleward boundaries by using northward IMF direction as the input of our model. Meanwhile, there has an opposite result under southward IMF direction condition. The variation of MAE in poleward boundaries are bigger than equatorward boundaries when the input of our model is southward IMF direction. Therefore, we can know that the northward IMF direction has a great influence on the equatorward boundaries, and the southward IMF direction has a significant effect on poleward boundaries.**

We can see that AE has strong positively correlation to AU and PC, and AL has strong negative correlation to AE, AU and PC from Table 4. The linear correlation coefficient between AE and AL is -0.9437, which verified that AL index has the opposite effect on auroral boundary compared with AE index. In contrast, the impact of AU index on auroral boundary is similar to the impact of AE index on auroral boundary because of the strong positive correlation between AE and AU. Those conclusions mentioned above is consistent with the conclusions of the statistical experiment 3. In addition, the correlation coefficient between AE and PC is 0.8067, which implies PC should have homologous trend with AE in every MLT section. Fig.8 shows the response of poleward and equatorward boundaries to PC respectively. The PC index can serve as an indicator of auroral electrojet activity. Vennerstrøm found that PC is sensitive to electrojet activity and substorm intensifications of the westward electrojet in the midnight or post-midnight sector (Vennerstrøm et al., 1991). This conclusion matches to what we found about the impact of PC on auroral oval boundary in Fig.8. When the input of our model only included the three geomagnetic indices (AE, AL, AU) and auroral oval boundary positions at the previous moment, the MAE of equatorward and poleward boundaries are 1.6569 and 1.5124 severally from Table 5. we can clearly know that the MAE of poleward and equatorward boundaries are both enlarged compared with S-MAE. As a result, we can draw the conclusion that the three geomagnetic indexes strengthen each other's effect when the combination of three geomagnetic indexes are inputted into our model. Beyond that, in Table 5, when AE, AU, AL, and PC are used as the input of our model, the MAE of poleward and

equatorward boundaries are 1.6734 and 1.5275 respectively, which shows that the combinations of those parameters have the important influence on the location of aurora oval boundary.

**Table 5: The MAE influenced by different combinations of space physical parameters.**

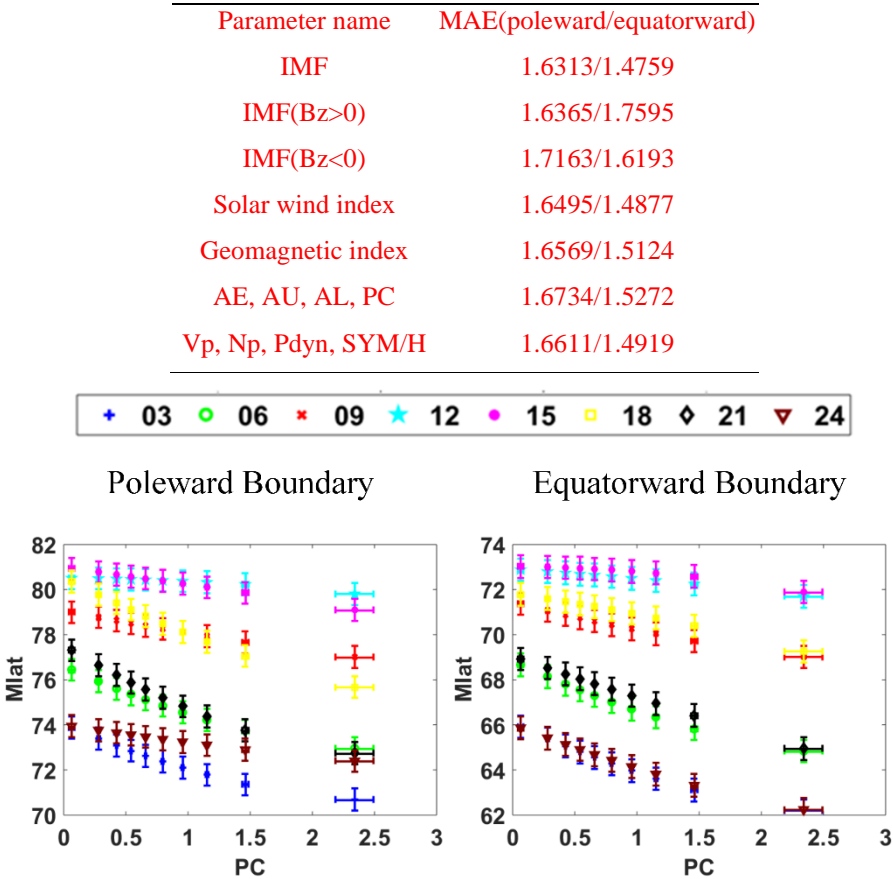

**Figure 8: Response of magnetic latitude of poleward (left column) and equatorward (right column) boundaries to PC at 0030, 0060, 0090, 1200, 1500,1800,2100 and 2400 MLT**

According to Table 4, there has obvious correlation among the following space physical parameters. For the solar wind parameters, Vp and Np are positive correlations, while Np and Pdyn are negative correlation, and the three parameters all are related to SYM/H. Firstly, we can obtain the similar inference on the three geomagnetic indices to solar wind parameters (Vp, Np, Pdyn) according to the MAE of three solar wind parameter combinations from Table 5 and the strong correlation between them. In other words, the three solar wind parameters also strengthen each other’s effect on auroral oval boundary when the combination of them are sent into our model. Secondly, when Np, Vp, Pdyn and SYM/H are as input to our model, the MAE of auroral oval boundaries are 1.6611 and 1.4919 in poleward and equatorward respectively in Table 5, which is bigger than the MAE of auroral oval boundaries when the inputs are Np, Vp and Pdyn. So, we can conclude that the combinations of these four parameters strengthen mutual influence on the location of aurora oval boundary. According to the statistics from Table 6,



the physical variables that appears most frequently are Bx, By, Vp and SYM/H. When the inputs of our model are the combination of these four variables or the combination of Bx and By, the MAE of auroral oval boundary reaches the minimum, which proves that these four parameters have great influence on the location of aurora oval boundary.

As a summary, it can be seen that these space physical parameters, which include Bx, By, Vp and SYM/H, play a crucial role in determining the location of auroral oval boundary based on the above conclusions.

**Table 6: The MAE influenced by different combinations of space physical parameters**

| Parameters name                                 | MAE (poleward/equatorward) |
|-------------------------------------------------|----------------------------|
| Bx, By                                          | 1.6145/1.5003              |
| Bx, Vp, SYM/H                                   | 1.6359/1.5129              |
| Bx, By, Vp, SYM/H                               | 1.6118/1.5056              |
| Bx, By, Vp, Pdyn, PC                            | 1.6242/1.5084              |
| Bx, By, Np, AU, SYM/H                           | 1.6154/1.5181              |
| Bx, By, Vp, Np, SYM/H, PC                       | 1.6324/1.5017              |
| Bz, Vp, Pdyn, AE, AU, AL, SYM/H                 | 1.6282/1.5125              |
| Bx, By, Bz, Vp, Np, Pdyn, AE, AU                | 1.6149/1.5044              |
| Bx, By, Bz, Vp, Np, Pdyn, AE, AU, PC            | 1.6994/1.5028              |
| Bx, By, Bz, Vp, Np, Pdyn, AL, AU, SYM/H, PC     | 1.6771/1.5716              |
| Bx, By, Bz, Vp, Np, Pdyn, AE, AL, AU, SYM/H, PC | 1.6669/1.5743              |

#### 4 Conclusion

In this paper, we establish a model to measure the relationship between space physical parameters from OMNI dataset on NASA website and poleward and equatorward auroral oval boundaries based on deep learning network. Our model overcomes some drawbacks in this field. Such as, some prediction method based on statistics and a few space physical parameters. **Those methods are not** very suitable for the complex and changeable space physical data. For our model, the inputs are 18 space physical parameters and the 48 coordinates value of aurora oval boundary points at the previous moment, and we can obtain position of poleward and equatorward boundaries at 24 MLTs from our well-trained model. At last, our experiment results show that the model proposed in this paper can better reflect the relationship between space physical parameters and auroral oval boundary. Therefore, it should be useful to predict the position of auroral oval boundary. In addition, we **analyse** the effect of all 18 space physical parameters on the location of auroral oval boundary based on several statistical and prediction experiments. It can be show that different parameters have different effect on auroral oval boundary from our experiments. Some space physical parameters, Bx, By, Vp and SYM/H, have a great influence on the position of auroral oval boundary.

*Author contributions.* The methodology has been developed by all of the authors. HYY have coded and run the experiments. All authors have discussed the theory, the interpretation of the results and edited the manuscript.

5

*Competing interests.* The authors declare that they have no conflict of interest.

10

*Acknowledgements.* The authors are thankful to Liu Jianjun for his comments and suggestions. HB have been funded by the National Natural Science Foundation of China (61572384), Shaanxi Key Technologies Research Program (2017KW-017),  
15 China's postdoctoral fund first-class funding (Grant Nos. 2014M560752), Shaanxi province postdoctoral science fund, the central university basic scientific research business fee (JBG150225). HZ. have been funded by the National Natural Science Foundation of China (41874195). GX. have been funded by the National Key Research and Development Program of China (2016QY01W0200). YH. have been funded by the National Natural Science Foundation of China (41831072). LB have been funded by the National Natural Science Foundation of China (41504116). LJ. have been funded by the National Natural  
20 Science Foundation of China (41674169) and the National Key Research and Development Program of China (2018YFC1407300).

25

30

## Reference

- Loomis, B.: On the geographical distribution of auroras in the northern hemisphere. *Am. J. Sci. and Arts*, 30, 89-94, 1890.
- Akasofu, S. I.: The latitudinal shift of the auroral belt. *J Atmos Sol-Terr Phys*, 26(12), 1167-1174, doi: 10.1016/0021-9169(64)90125-4, 1964.
- 5 Niu, Y., Zhang, X., He F. and Jiang, Y.: Statistical characteristics of the equatorial boundary of the nightside auroral particle precipitation. *Sci China Earth Sci*, 58(9), 1602-1608, doi: 10.1007/s11430-015-5090-x, 2015.
- Feldstein, Y. I. and Starkov, G. V.: Dynamics of auroral belt and polar geomagnetic disturbances. *Planet Space Sci*, 15(2), 209-229, doi: 10.1016/0032-0633(67)90190-0, 1967.
- Holzworth, R. H. and Meng. C.: Mathematical representation of the auroral oval. *Geophys Res Lett*, 2(9), 377-380, doi: 10.1029/GL002i009p00377, 1975.
- 10 Holzworth, R. H. and Meng. C.: Auroral boundary variations and the interplanetary magnetic field. *Planet Space Sci*, 32(1), 25-29, doi: 10.1016/0032-0633(84)90038-2, 1984.
- Starkov, G. V.: Statistical dependences between the magnetic activity indices. *Geomagn Aeronomy+*, 34, 101-101, 1994.
- Starkov, G. V.: Mathematical model of the auroral boundaries. *Geomagn Aeronomy+*, 34, 331-336, 1994.
- 15 Carbary, J. F.: A Kp-based model of auroral boundaries. *Space Weather*, 3, S10001, doi: 10.1029/2005SW000162, 2005.
- Zhang, Y. and Paxton, L. J.: An empirical Kp-dependent global auroral model based on TIMED/GUVI FUV data. *J Atmos Sol-Terr Phys*, 70(8), 1231-1242, doi: 10.1016/j.jastp.2008.03.008, 2008.
- Sigernes, F., Dyrland, M., Brekke, P., Chernouss, S., Lorentzen, D.A., Oksavik, K. and Sterling, D. C.: Two methods to forecast auroral displays. *J Space Weather SPAC*, 1(1), A03, doi:10.1051/swsc/2011003, 2011.
- 20 Milan, S. E., Evans, T. A. and Hubert, B.: Average auroral con-figuration parameterized by geomagnetic activity and solar wind conditions. *Ann Geophys*, 28(4), 1003-1012, doi:10.5194/angeo-28-1003-2010, 2010.
- Hu, Z., Yang, Q., Liang, J., Hu, H., Zhang, B. and Yang, H.: Variation and modeling of ultraviolet auroral oval boundaries associated with interplanetary and geomagnetic parameters. *Space Weather*, 15(4), 606-622, doi: 10.1002/2016SW001530, 2017.
- 25 Yang, Q., Hu, Z., Han, D., Hu, H. and Xiao, M.: Modeling and prediction of ultraviolet auroral oval boundaries base on IMF/solar wind and geomagnetic parameters. *Chinese J Geophys-CH*, 59(2), 426-439, doi: 10.6038/cjg20160203, 2016.
- Ding, G., He, F., Zhang, X. and Chen, X.: A new auroral boundary determination algorithm based on observations from TIMED/GUVI and DMSP/SSUSI. *J Geophys Res-Space*, 122(2), 2162-2173, doi: 10.1002/2016JA023295, 2017.
- LeCun, Y., Bengio, Y. and Hinton, G.: Deep learning. *Nature*, 521(7553), 436-444, doi: 10.1038/nature14539, 2015.
- 30 Liu, H., Gao, X., Han, B. and Yang, X.: An automatic MSRM method with a feedback based on shape information for auroral oval segmentation. *Springer Berlin Heidelberg*. 8261, 748-755, doi: 10.1007/978-3-642-42057-3\_94, 2013.
- King, J. and Papitashvili, N.: One min and 5-min solar wind data sets at the Earth's bow shock nose. <http://omniweb.gsfc.nasa.gov/html/HROdocum.html>, 2014.

- Hinton, G. E., Osindero, S. and Teh, Y. W.: A fast learning algorithm for deep belief nets. *Neural computation*, 18(7), 1527-1554, doi: 10.1162/neco.2006.18.7.1527, 2006.
- Yu, D. and Deng, L.: Deep learning and its applications to signal and information processing [exploratory dsp]. *IEEE Signal Proc Mac*, 28(1), 145-154, doi: 10.1109/MSP.2010.939038, 2011.
- 5 Łukaszyk, S.: A new concept of probability metric and its applications in approximation of scattered data sets. *Computational Mechanics*, 33(4), 299-304, doi: 10.1007/s00466-003-0532-2, 2004.
- Hinton, G. E.: Training products of experts by minimizing contrastive divergence. *Neural computation*, 14(8), 1771-1800, doi: 10.1162/089976602760128018, 2002.
- Hinton, G. E.: A practical guide to training restricted Boltzmann machines. *Momentum*, 9(1), 599-619, doi: 10.1007/978-3-642-35289-8\_32, 2012.
- 10 Krizhevsky A, Sutskever I, Hinton G E.: Imagenet classification with deep convolutional neural networks. *Adv Neural Inform Process Syst*, 25(2), 1097-1105, doi: 10.1145/3065386, 2012.
- Rumelhart, D. E.: Learning representations by back-propagating errors. *Nature*, 323, 533-536, doi: 10.1016/B978-1-4832-1446-7.50035-2, 1986.
- 15 Fitzgibbon, A., Pilu, M. and Fisher, R. B.: Direct least square fitting of ellipses. *IEEE TPAMI*, 21(5): 476-480, doi: 10.1109/34.765658, 1999.
- Cho, J. S., Lee, D. Y., Kim, K. C. and Lee, J. H.: Response of the poleward boundary of the nightside auroral oval to impacts of solar wind dynamic pressure enhancement. *J. Astron. Space Sci.*, 27(27), 189-194, doi: 10.5140/JASS.2010.27.3.189, 2010.
- Makita, K., Meng, C. I. and Akasofu, S. I.: The shift of the auroral electron precipitation boundaries in the dawn-dusk sector in association with geomagnetic activity and interplanetary magnetic field. *J Geophys Res-Space*, 88(A10), 7967-7981, doi: 10.1029/JA088iA10p07967, 1983.
- 20 Xing, Z., Yang, H., Han, D. and Wu, Z.: Dayside poleward moving auroral forms and ionospheric convection under stable interplanetary magnetic field (IMF) conditions. *Sci China Technol Sc*, 56(4), 910-916, doi: 10.1007/s11431-013-5164-y, 2013.
- Karlson, K. A., Oieroset, M., Moen, J. and Sandholt, P. E.: A statistical study of flux transfer event signatures in the dayside aurora: The IMF By-related prenoon-postnoon asymmetry. *J Geophys Res*, 101(A1), 59–68, doi: 10.1029/95JA02590, 1996.
- 25 Cowley, S. W. H. and Lockwood, M.: Excitation and decay of solar wind-driven flows in the magnetosphere-ionosphere system. *Ann Geophys*, 10, 103–115, 1992.
- Huang, C., Andre, D. A., Sofko, G. J. and Koustov, A. V.: Evolution of ionospheric multicell convection during northward interplanetary magnetic field with  $|B_z/By| > 1$ . *J Geophys Res*, 105 (A12), 7095–7107, doi: 10.1029/2000JA000163, 2000.
- 30 Provan, G., Yeoman, T. K. and Cowley, S. W. H.: The influence of the IMF By component on the location of pulsed flows in the dayside ionosphere observed by an HF radar. *Geophys Res Lett*, 26 (4), 521–524, doi: 10.1029/1999GL900009, 1999.
- Boudouridis, A., Zesta, E., Lyons, R., Anderson, P. C. and Lummerzheim, D.: Effect of solar wind pressure pulses on the size and strength of the auroral oval. *J Geophys Res-Space*, 108(A4), doi: 10.1029/2002JA009373, 2003.

Peng, Z., Wang, C., Hu, Y., Kan, J. and Yang, Y.: Simulations of observed auroral brightening caused by solar wind dynamic pressure enhancements under different interplanetary magnetic field conditions. *J Geophys Res-Space*, 116(A6), doi: 10.1029/2010JA016318, 2011.

Vennerstrøm, S., Friis-Christensen, E., Troshichev, O. A. and Andersen, V. G.: Comparison between the polar cap index, PC, and the auroral electrojet indices AE, AL, and AU. *J Geophys Res-Space*, 96(A1), 101-113, doi: 10.1029/90JA01975, 1991.
